# Supplementary material for: C8J_1298, a bifunctional thiol oxidoreductase of Campylobacter jejuni, affects Dsb (disulfide bond) network functioning
Source: PubMed Central journal article supplement (PMC7089426; doi:10.1371/journal.pone.0230366), 2020-03-23
Supplement: pone.0230366.s013.pdf [file pone.0230366.s013.pdf]

Fig 2D.

glutaraldehyde concentration

MW

0%

0,02%

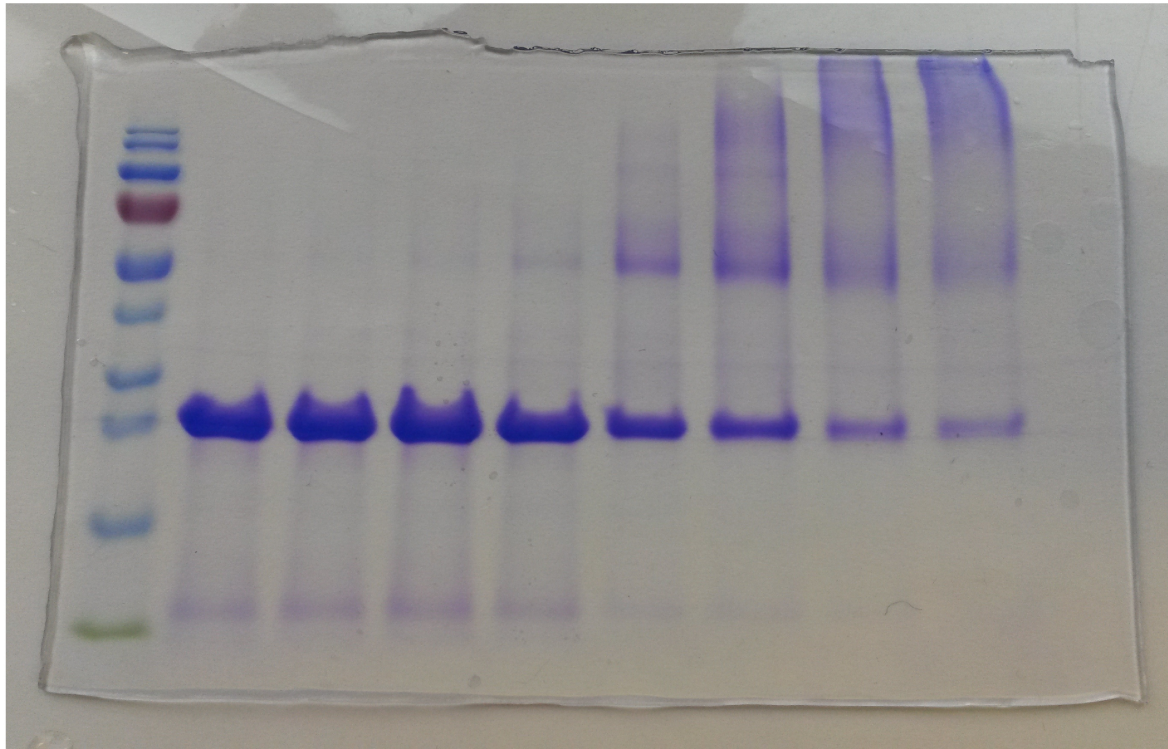

captured using mobile phone

Fig 3A

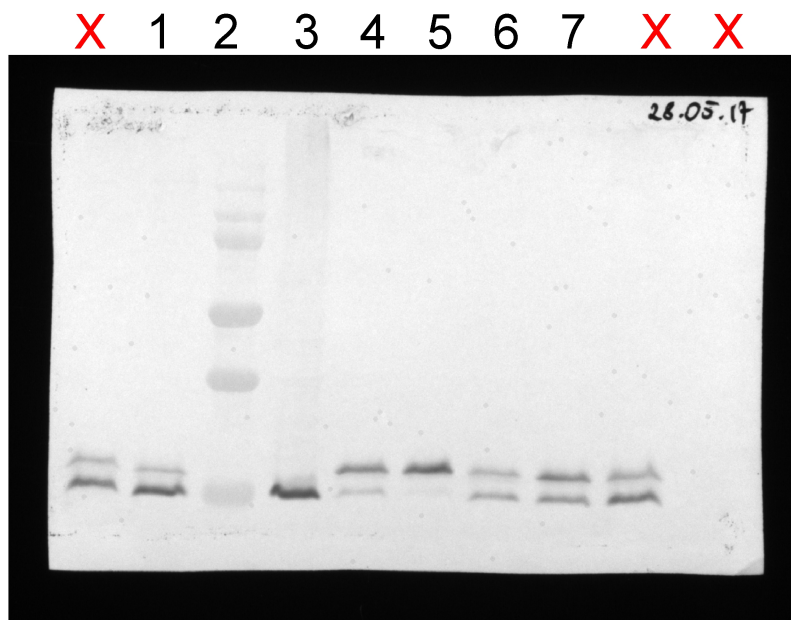

- 1 -  $\Delta dsbD$  + AMS
- 2 - MW
- 3 - WT
- 4 - WT + AMS
- 5 - WT + DTT + AMS
- 6 -  $\Delta dsbI$  + AMS
- 7 -  $\Delta dsbB$  + AMS

Fig 3B

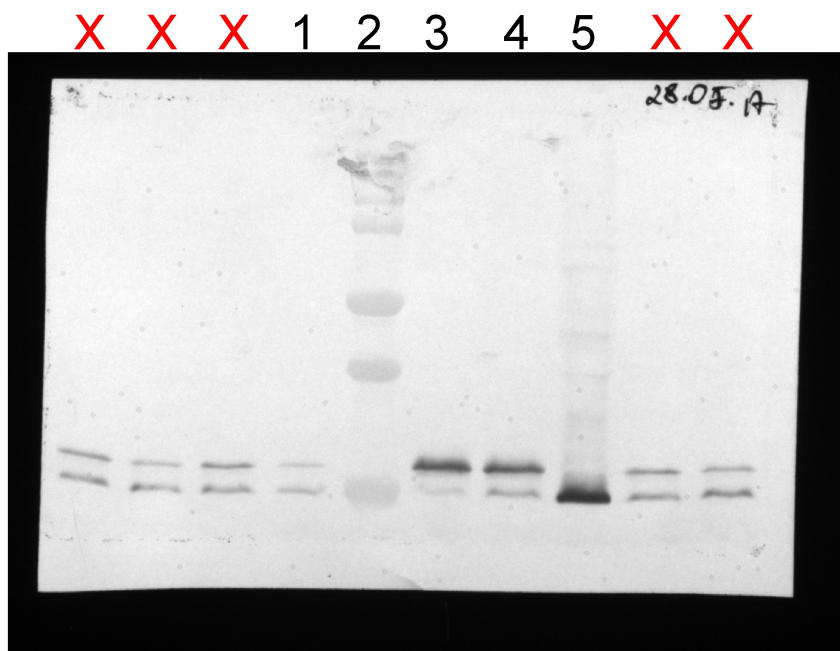

- 1 -  $\Delta dsbA1$  + AMS
- 2 - MW
- 3 - WT+DTT + AMS
- 4 - WT + AMS
- 5 - WT

Fig 4A

1 2 3 4 5 6 X X X X

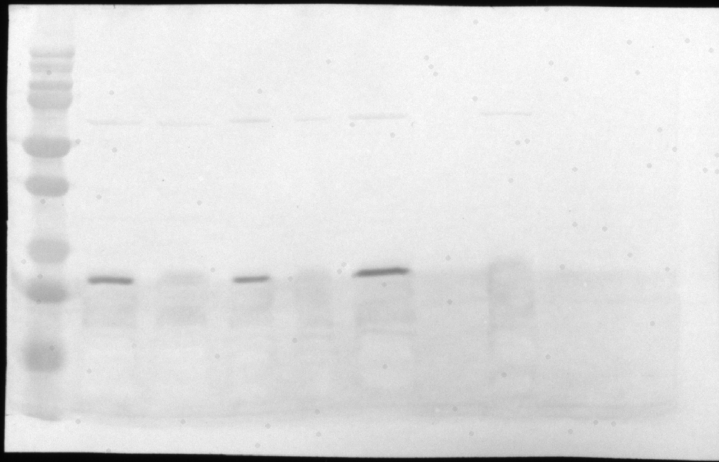

- 1 - Molecular weight marker
- 2 - *C. jejuni* 81116 WT
- 3 -  $\Delta dsbA1$
- 4 -  $\Delta c8j\_1298$
- 5 -  $\Delta dsbA1\Delta c8j\_1298$
- 6 -  $\Delta dsbA1\Delta c8j\_1298/chrA1$

Fig 4B

X 1 2 3 4 5 6 X X X X

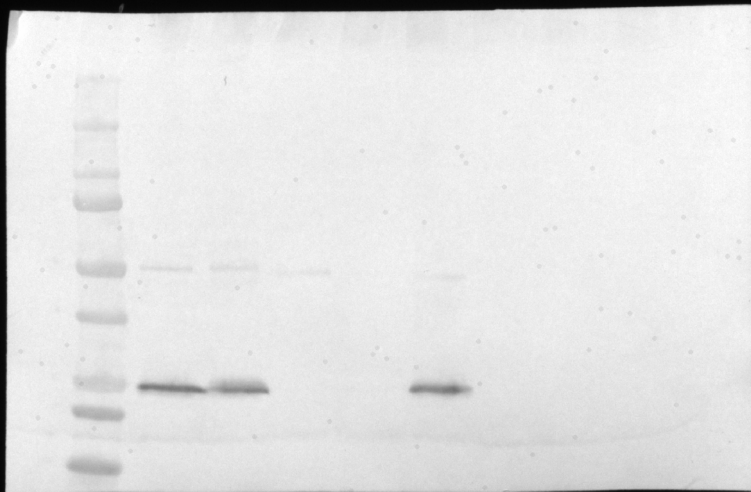

- 1 - Molecular weight marker
- 2 - *C. jejuni* 81116 WT
- 3 -  $\Delta dsbA1$
- 4 -  $\Delta c8j\_1298$
- 5 -  $\Delta dsbA1\Delta c8j\_1298$
- 6 -  $\Delta dsbA1\Delta c8j\_1298/chr1298$

# Fig 7A

1 2 3 4 5 6 7 8 9

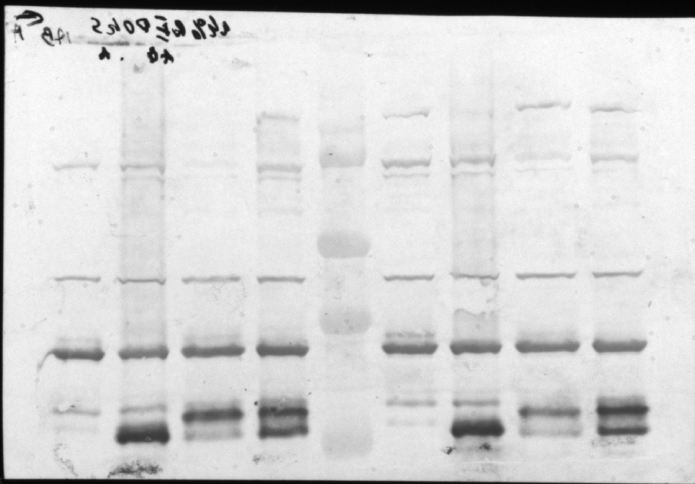

- 1 -  $\Delta dsbA$
- 2 -  $\Delta dsbA/pI1298$
- 3 -  $\Delta dsbA/pI1298 + DTT + AMS$
- 4 -  $\Delta dsbA/pI1298 + AMS$
- 5 - Molecular weight marker
- 6 -  $\Delta dsbA\Delta dsbB$
- 7 -  $\Delta dsbA\Delta dsbB/pI1298$
- 8 -  $\Delta dsbA\Delta dsbB/pI1298 + DTT + AMS$
- 9 -  $\Delta dsbA\Delta dsbB/pI1298 + AMS$

# Fig 7B

X 1 2 3 4 5 X X X

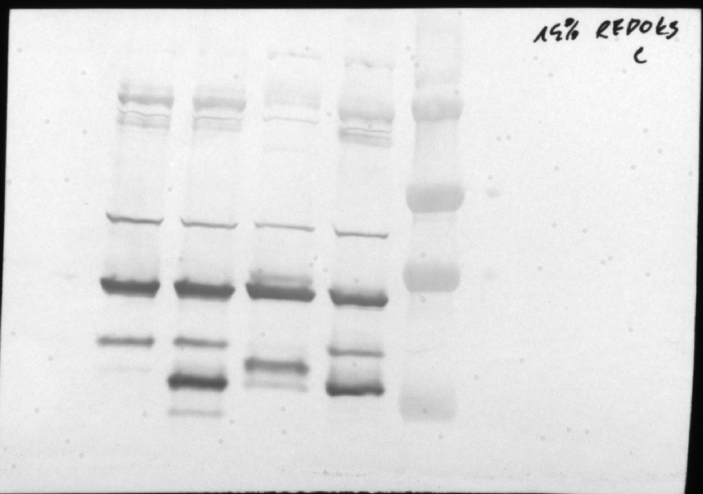

- 1 -  $\Delta dsbC$
- 2 -  $\Delta dsbC/pI1298$
- 3 -  $\Delta dsbC/pI1298 + DTT + AMS$
- 4 -  $\Delta dsbC/pI1298 + AMS$
- 5 - Molecular weight marker



# S2 Fig

glutathione reduced (GSH)  
concentration

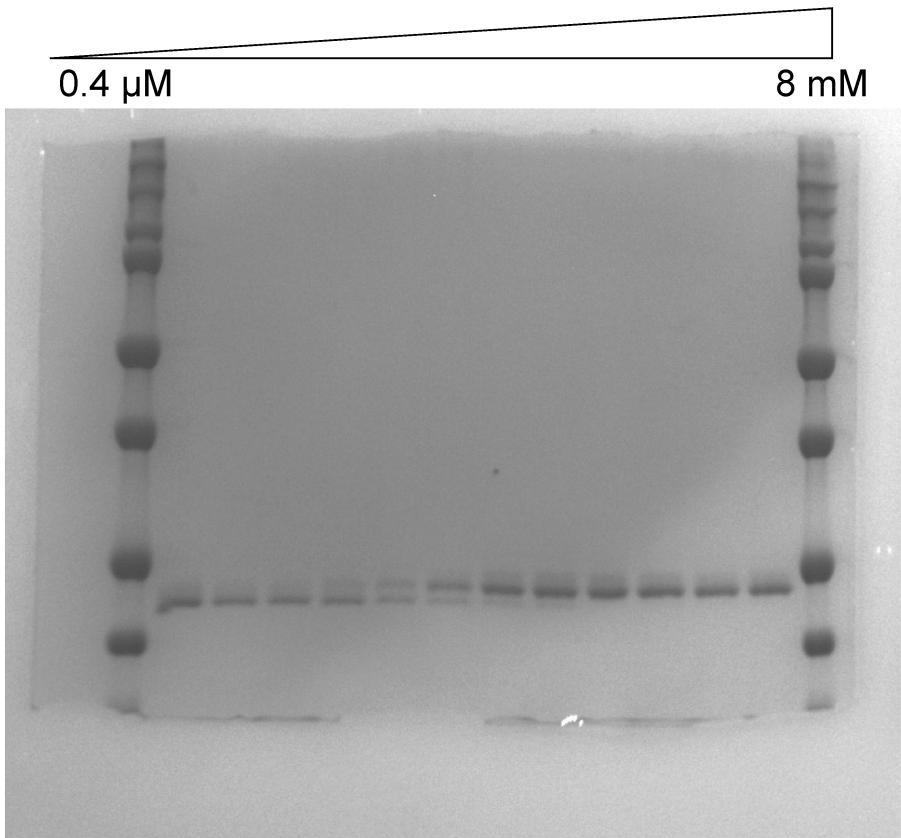

captured using Bio-Rad Gel Doc XR+ system

# S3A Fig

X X X X 1 2 3 4 5 6 X X

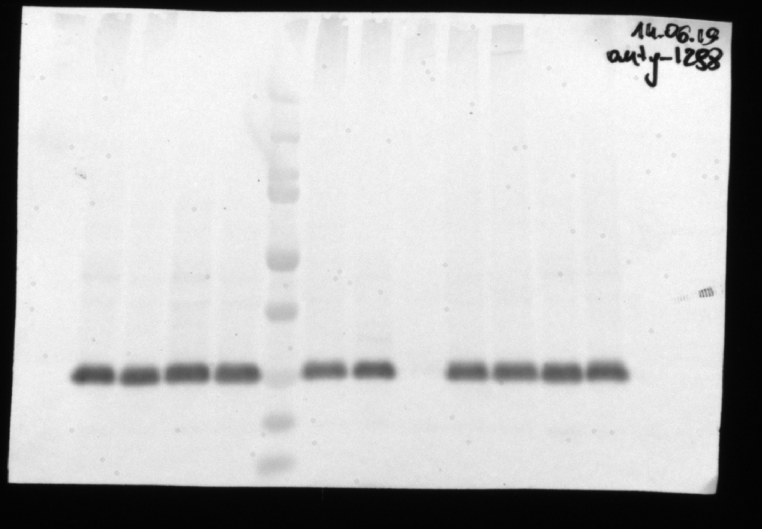

- 1 - Molecular weight marker
- 2 - *C. jejuni* 81116 WT
- 3 -  $\Delta dsbA1$
- 4 -  $\Delta c8j\_1298$
- 5 -  $\Delta c8j\_1298/pI1298$
- 6 -  $\Delta c8j\_1298/chr1298$

# S3B Fig

X X X X 1 2 3 4 5 6 X X

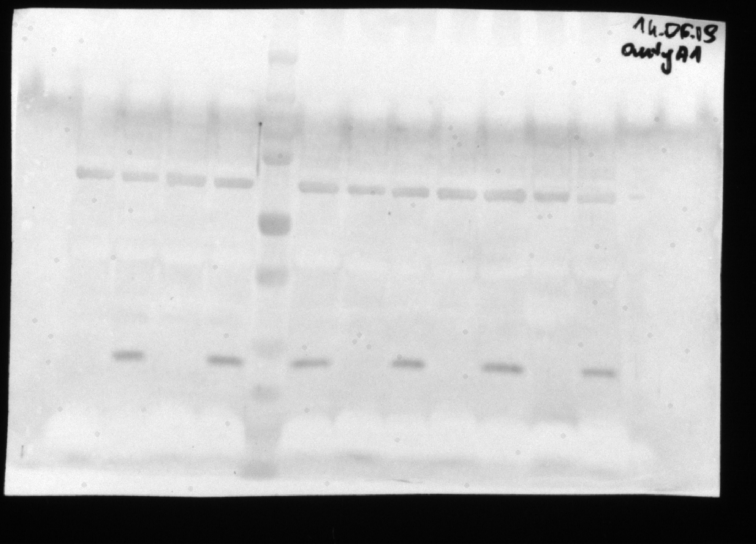

- 1 - Molecular weight marker
- 2 - *C. jejuni* 81116 WT
- 3 -  $\Delta dsbA1$
- 4 -  $\Delta c8j\_1298$
- 5 -  $\Delta c8j\_1298/pI1298$
- 6 -  $\Delta c8j\_1298/chr1298$

# S4 Fig

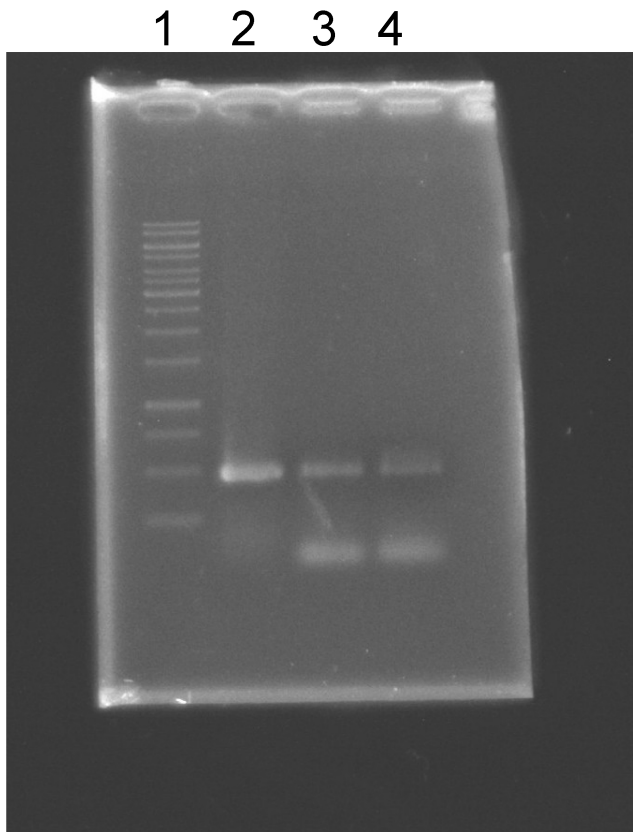

- 1 - Molecular weight marker
- 2 - gDNA *C. jejuni* 81116 WT
- 3 - cDNA *C. jejuni* 81116 WT
- 4 - cDNA  $\Delta c8j_{1298}$

captured using Bio-Rad Gel Doc XR+ system

# S6 Fig

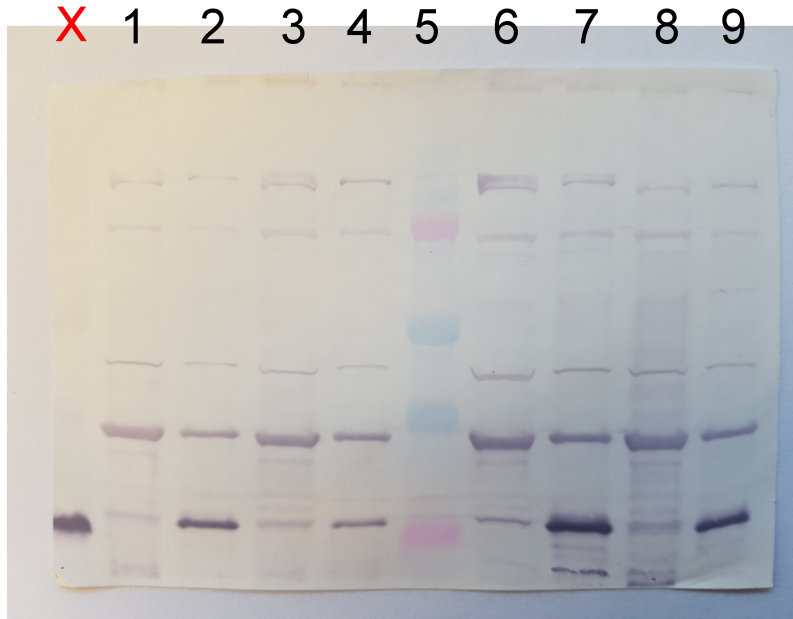

- 1 -  $\Delta dsbA$ /pI1298 - ara
- 2 -  $\Delta dsbA$ /pI1298 + ara
- 3 -  $\Delta dsbC$ /pI1298 - ara
- 4 -  $\Delta dsbC$ /pI1298 + ara
- 5 - Molecular weight marker
- 6 -  $\Delta mdoG\Delta dsbC$ /pI1298 - ara
- 7 -  $\Delta mdoG\Delta dsbC$ /pI1298 + ara
- 8 -  $\Delta dsbA\Delta dsbB$ /pI1298 - ara
- 9 -  $\Delta dsbA\Delta dsbB$ /pI1298 + ara

captured using mobile phone
